# Supplementary material for: Breathing New Life to Ancient Crops: Promoting the Ancient Philippine Grain “Kabog Millet” as an Alternative to Rice
Source: PubMed Central journal article supplement (PMC7761226; doi:10.3390/foods9121727), 2020-11-24
Supplement: foods-09-01727-s001.pdf [file foods-09-01727-s001.pdf]

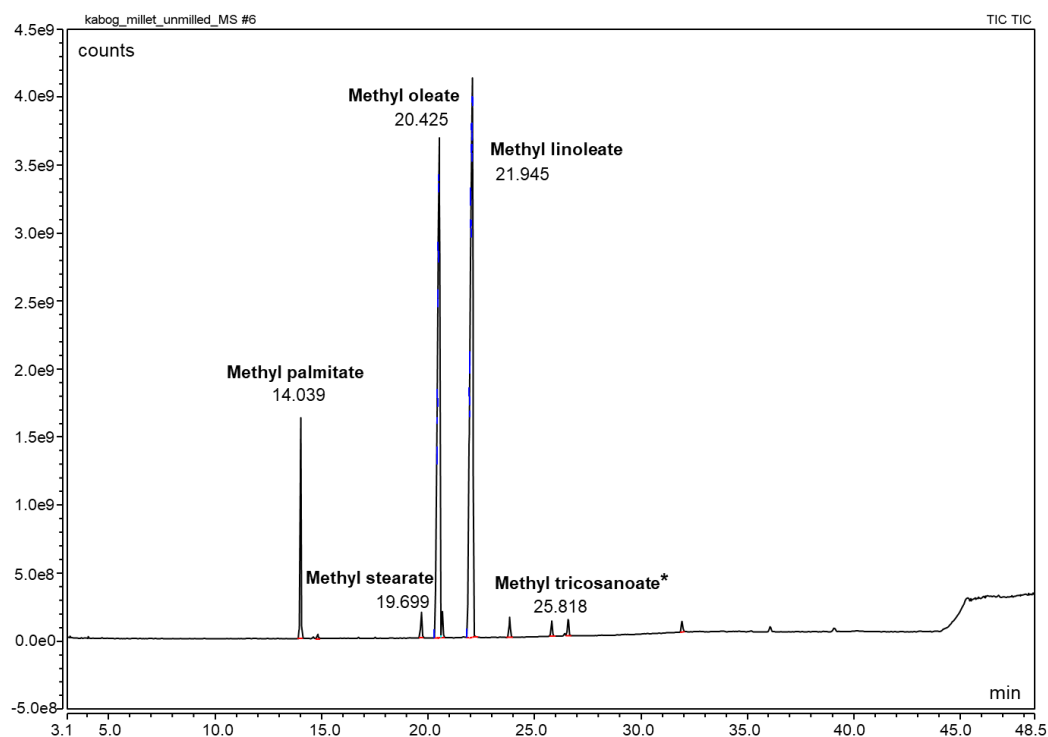

(A)

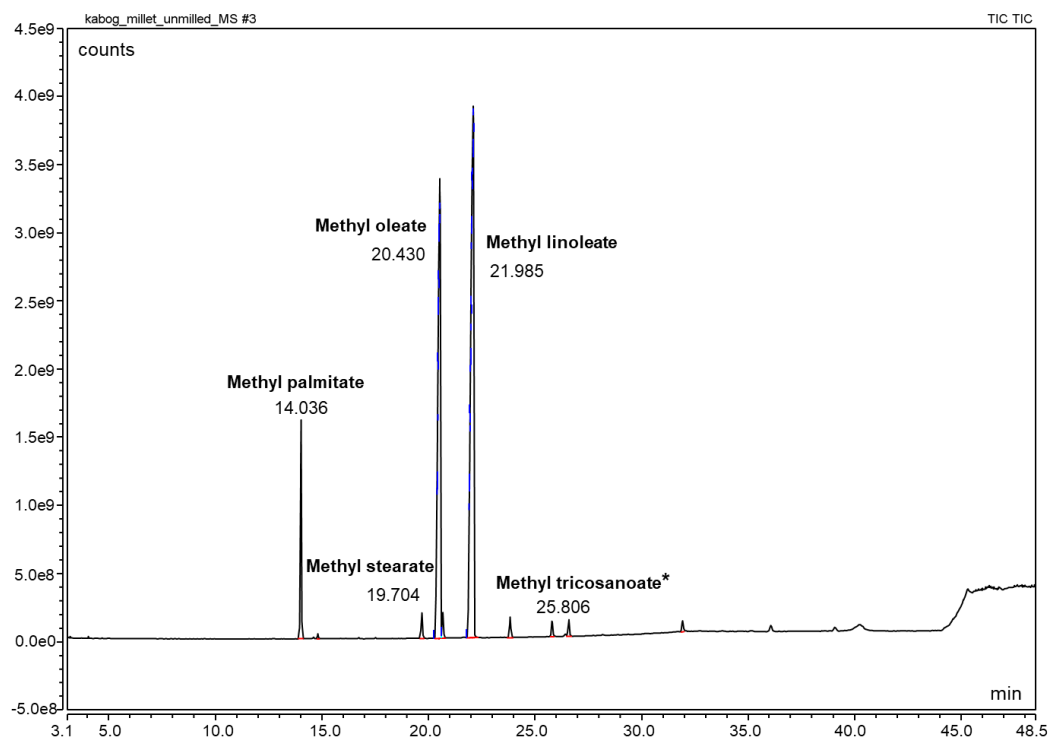

(B)

**Figure S1.** Fatty acid methyl esters (FAMES) analysis by GC-MS showing the total ion chromatogram (TIC) of fatty acids extracted from whole kabog millet sample source 1 (A) and whole kabog millet sample source 2 (B). (\*) in methyl tricosanoate refers to very small quantities detected.
